# Supplementary material for: Local Injection of Submicron Particle Docetaxel is Associated with Tumor Eradication, Reduced Systemic Toxicity and an Immunologic Response in Uro-Oncologic Xenografts
Source: MDPI journal article supplement (doi:10.3390/cancers11040577), 2019-04-24

*Supplementary Material*

## Local Injection of Submicron Particle Docetaxel is Associated with Tumor Eradication, Reduced Systemic Toxicity and an Immunologic Response in Uro-oncologic Xenografts

Holly Maulhardt, Lauren Hylle, Michael Frost, Ashley Tornio, Sara Dafoe, Leanne Drummond, David I. Quinn, Ashish Kamat and Gere diZerega

**Table S1.** Inflammatory cell infiltrate density per treatment group in renal cancer study.

|                                    | Treatment                   | Total # of Animals | Mild | Moderate | Marked |
|------------------------------------|-----------------------------|--------------------|------|----------|--------|
| Non-NanoDoce <sup>®</sup> -Treated | Non-treated Control         | 2                  | 2    | -        | -      |
|                                    | IT vehicle 3×               | 2                  | 2    | -        | -      |
|                                    | IV Docetaxel 3×             | 2                  | 2    | -        | -      |
| NanoDoce <sup>®</sup> -Treated     | IT NanoDoce <sup>®</sup> 1× | 3                  | 2    | 1        | -      |
|                                    | IT NanoDoce <sup>®</sup> 2× | 3                  | -    | 3        | -      |
|                                    | IT NanoDoce <sup>®</sup> 3× | 2                  | -    | 1        | 1      |

Semi-quantitative H&E and IHC (anti-CD11b) assessment of lymphohistiocytic infiltrate density. Among non-NanoDoce<sup>®</sup>-treated animals, a mild lymphohistiocytic infiltrate was present in the peritumoral non-neoplastic stroma without overt inflammation within the tumor. By contrast, five of the eight animals in the IT NanoDoce<sup>®</sup> groups contained a moderate lymphohistiocytic infiltrate and one had a marked lymphohistiocytic infiltrate. This correlated with the increased amount of necrosis in the IT NanoDoce<sup>®</sup>-treated animals.

**Table S2.** Degree of tumor necrosis in renal cancer study.

|                                    | Treatment                   | Total # of Animals | 100% | >90% | 50–90% | 5–50% | <5% |
|------------------------------------|-----------------------------|--------------------|------|------|--------|-------|-----|
| Non-NanoDoce <sup>®</sup> -Treated | Non-treated Control         | 2                  | -    | -    | -      | -     | 2   |
|                                    | IT vehicle 3×               | 2                  | -    | -    | -      | -     | 2   |
|                                    | IV Docetaxel 3×             | 2                  | -    | -    | -      | -     | 2   |
| NanoDoce <sup>®</sup> -Treated     | IT NanoDoce <sup>®</sup> 1× | 3                  | 1    | -    | -      | -     | 2*  |
|                                    | IT NanoDoce <sup>®</sup> 2× | 3                  | 1    | 1    | 1      | -     | -   |
|                                    | IT NanoDoce <sup>®</sup> 3× | 2                  | 2    | -    | -      | -     | -   |

\* Surrounding tissue not available in sufficient quantity for definitive necrosis assessment. One of these did contain a focal rim of necrosis that represented <5% of the submitted tissue area. Tumor necrosis in the non-NanoDoce<sup>®</sup>-treated groups consisted of small discrete foci of necrosis in the tumor that occupied < 5% of the tumor area, and located within central portions of the tumor nodule, suggesting these may be secondary to hypoxemia.

**Table S3.** Degree of tumor necrosis in bladder cancer study.

| Treatment                          |                             | Total # of Animals | 100% | >90% | 50–90% | 11–50% | 5–10% | <5% |
|------------------------------------|-----------------------------|--------------------|------|------|--------|--------|-------|-----|
| Non-NanoDoce <sup>®</sup> -Treated | Non-treated Control         | 1                  | -    | -    | -      | -      | 1     | -   |
|                                    | IT vehicle 3×               | 2                  | -    | -    | 1      | 1      | -     | -   |
|                                    | IV Docetaxel 3×             | 2                  | -    | -    | 1      | 1      | -     | -   |
| NanoDoce <sup>®</sup> -Treated     | IT NanoDoce <sup>®</sup> 1× | 3                  | -    | -    | 1      | 2      | -     | -   |
|                                    | IT NanoDoce <sup>®</sup> 2× | 5                  | 2    | 2    | -      | -      | 1     | -   |
|                                    | IT NanoDoce <sup>®</sup> 3× | 3                  | 3    | -    | -      | -      | -     | -   |

Tumor cell necrosis in the non-NanoDoce-treated animals included two with 50–90% tumor necrosis. Overall, the extent of tumor cell necrosis was greater in the NanoDoce-treated groups than in the non-NanoDoce-treated groups.

**Table S4.** Macrophage infiltrate density in bladder cancer study.

| Treatment                          |                             | Total # of Animals | Mild | Moderate | Marked |
|------------------------------------|-----------------------------|--------------------|------|----------|--------|
| Non-NanoDoce <sup>®</sup> -Treated | Non-treated Control         | 1                  | 1    | -        | -      |
|                                    | IT vehicle 3×               | 2                  | 2    | -        | -      |
|                                    | IV Docetaxel 3×             | 2                  | 2    | -        | -      |
| NanoDoce <sup>®</sup> -Treated     | IT NanoDoce <sup>®</sup> 1× | 3*                 | 2    | -        | -      |
|                                    | IT NanoDoce <sup>®</sup> 2× | 5                  | 4    | 1        | -      |
|                                    | IT NanoDoce <sup>®</sup> 3× | 3                  | -    | 3        | -      |

\* One of these had no surrounding non-neoplastic tissue available for assessment. Semi-quantitative H&E and IHC (anti-CD68) assessment of macrophage infiltrate density in surrounding non-neoplastic tissue. The intensity of the macrophage infiltrate in the surrounding non-neoplastic tissue was not striking in any of the animals; however, when the non-NanoDoce<sup>®</sup>-treated groups were compared to the NanoDoce<sup>®</sup>-treated groups, it was noted that the latter contained cases with a moderate degree of macrophage infiltrate while this was not seen in the non-NanoDoce<sup>®</sup>-treated groups.

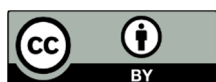

Supplement: s1 [file s1]
